# Supplementary material for: Controlled fabrication of highly conductive three-dimensional flowerlike poly (3,4-ethylenedioxythiophene) nanostructures
Source: Royal Society of Chemistry journal article supplement (doi:10.1039/c1jm10335k), 2011-01-01

## Supporting Information

### Controlled Fabrication of Highly Conductive Three-dimensional Flowerlike Poly (3, 4-ethylenedioxythiophene) Nanostructures

Xiaoxia Bai,<sup>a,b</sup> Xiujie Hu,<sup>\*a</sup> Shuyun Zhou,<sup>\*a</sup> Jun Yan,<sup>a</sup> Chenghua Sun,<sup>a</sup> Ping Chen<sup>a</sup> and Laifeng Li<sup>a</sup>

<sup>a</sup>Key Laboratory of Photochemical Conversion and Optoelectronic Materials, Technical Institute of Physics and Chemistry, Chinese Academy of Sciences, Beijing 100190, China.

<sup>b</sup>Graduate University of Chinese Academy of Sciences, Beijing 100049, China

\*Author Email Address: [huxiujie@mail.ipc.ac.cn](mailto:huxiujie@mail.ipc.ac.cn), [zhou\\_shuyun@mail.ipc.ac.cn](mailto:zhou_shuyun@mail.ipc.ac.cn)

Author Address: No.2, Beiyitiao, Zhongguancun, Haidian District, Beijing 100190, China.

**Figure S1** FTIR spectra of PEDOT powder (compressed with KBr as a wafer) prepared with different  $N$  values: (a)  $N=1.5$ ; (b)  $N=30$ .

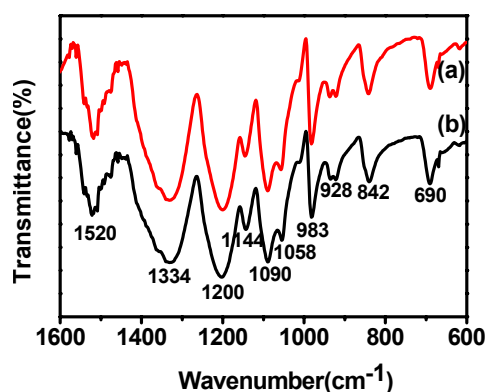

**Figure S2** UV-vis absorption spectra of PEDOT prepared under the same concentration of 7M aqueous FeCl<sub>3</sub> solution with different *N* values.

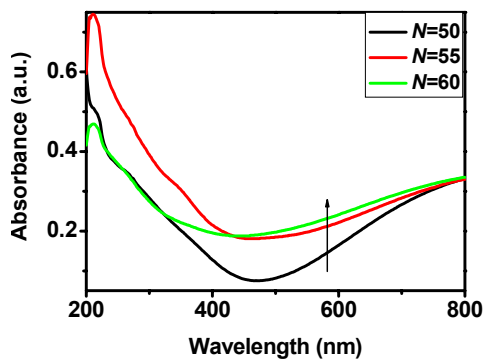

**Figure S3** XPS survey spectra of PEDOT bulk powder prepared with different values of *N*: (A) *N* = 1.5; (B) *N* = 15; (C) *N* = 30.

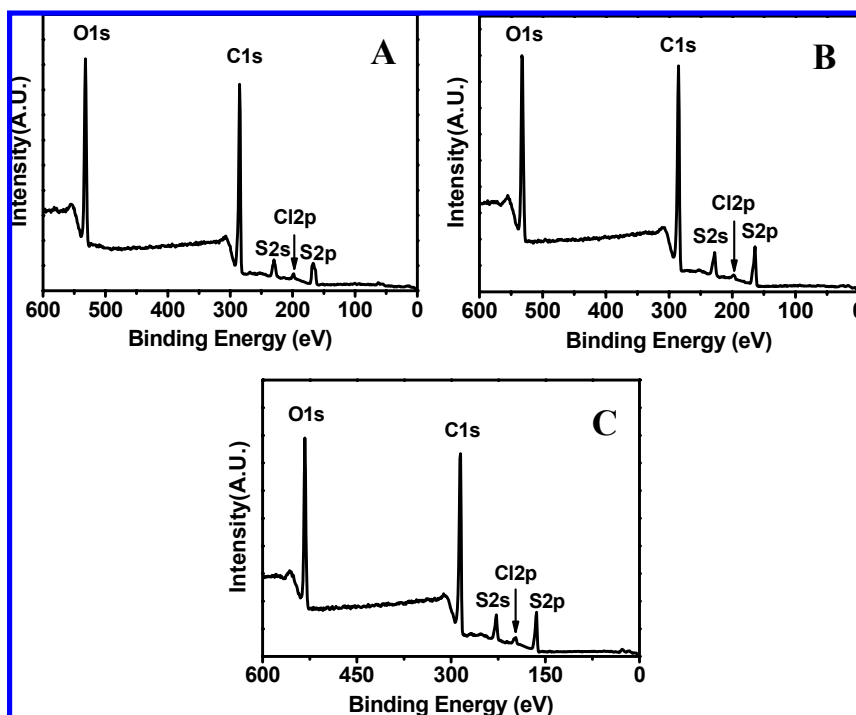

**Figure S4.** Cl2p and S2p core level spectra of PEDOT bulk powder prepared with different values of  $N$ : (A, B)  $N = 1.5$ ; (C, D)  $N = 15$ .

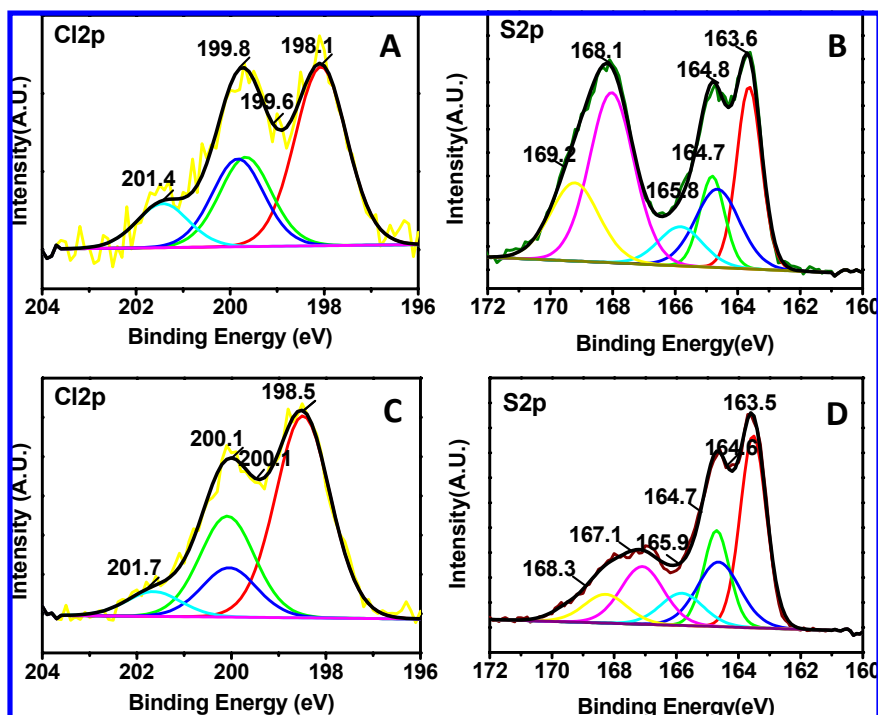

**Figure S5** UV-vis absorption spectra of as-prepared PEDOT under different concentrations of aqueous  $\text{FeCl}_3$  solution with the same  $N$  value of 30.

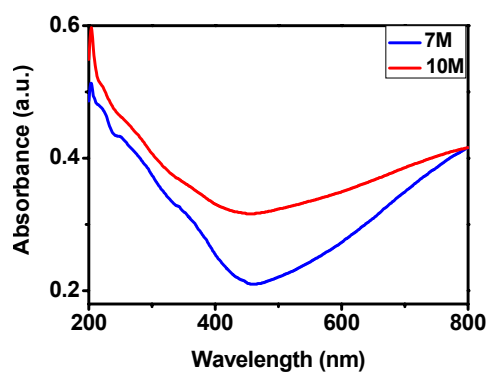

Supplement: c1jm10335k.pdf [file c1jm10335k.pdf]
